# Supplementary material for: Ebola virus sequesters IRF3 in viral inclusion bodies to evade host antiviral immunity
Source: eLife journal article supplement (doi:10.7554/elife.88122), 2023-06-27
Supplement: fig1-data1 [file Figure 1-Source Data 1.xlsx]

## Sheet: Figure 1B
Figure 1B
	The intensities (AU) of VP35 and IRF3 were analyzed by ImageJ software after 48 h of trVLP infection
	Length (μm)	IRF3	VP35
	0	40.539	0.104
	0.186248	49.864	1.977
	0.372552	55.396	8.354
	0.5588	45.879	20.546
	0.745048	42.163	39.828
	0.931352	56.201	73.73
	1.1176	54.982	130.137
	1.30385	40.604	202.364
	1.49015	69.514	247.434
	1.6764	125.164	254.987
	1.86265	164.543	255
	2.04895	189.192	255
	2.2352	206.112	254.954
	2.42145	210.38	252.615
	2.60775	201.917	237.833
	2.794	184.78	210.674
	2.98025	177.807	181.51
	3.16655	194.173	158.928
	3.3528	204.227	141.759
	3.53905	195.384	129.88
	3.72535	188.627	122.421
	3.9116	191.07	114.694
	4.09785	193.15	105.846
	4.28415	185.49	99.864
	4.4704	177.154	96.525
	4.65665	179.085	92.505
	4.84295	189.497	89.243
	5.0292	198.404	87.134
	5.21545	189.209	85.489
	5.40175	168.61	85.607
	5.588	158.915	86.71
	5.77425	171.688	87.718
	5.96055	196.663	88.568
	6.1468	210.408	88.759
	6.33305	205.766	90.606
	6.51935	200.288	93.317
	6.7056	204.585	94.266
	6.89185	210.798	93.869
	7.07815	202.633	95.563
	7.2644	174.719	98.576
	7.45065	150.073	98.372
	7.63695	144.546	95.828
	7.8232	149.467	93.721
	8.00945	161.799	90.593
	8.19575	172.573	85.126
	8.382	167.87	81.551
	8.56825	166.166	83.166
	8.75455	185.82	84.119
	8.9408	199.804	82.314
	9.12705	190.244	80.277
	9.31335	170.108	77.639
	9.4996	151.923	73.013
	9.68585	138.713	68.983
	9.87215	116.622	67.835
	10.0584	96.291	68.472
	10.2447	109.07	68.178
	10.4309	142.103	66.686
	10.6172	160.148	64.442
	10.8034	156.305	64.941
	10.9898	161.444	67.927
	11.176	183.492	71.111
	11.3622	198.228	72.695
	11.5486	198.492	73.551
	11.7348	197.896	75.931
	11.921	205.748	79.592
	12.1074	207.469	83.081
	12.2936	182.071	86.501
	12.4799	151.092	91.039
	12.6662	150.916	96.607
	12.8524	171.992	102.909
	13.0387	173.724	107.728
	13.2249	158.367	111.037
	13.4112	159.851	116.384
	13.5975	174.678	124.898
	13.7837	191.508	132.223
	13.97	214.633	138.03
	14.1562	233.519	147.395
	14.3425	237.413	160.993
	14.5288	218.691	172.233
	14.715	174.443	180.58
	14.9014	124.611	191.872
	15.0876	111.935	196.448
	15.2738	128.365	185.954
	15.4602	139.261	163.85
	15.6464	138.215	136.462
	15.8326	121.648	113.086
	16.019	79.749	104.382
	16.2052	38.814	108.904
	16.3914	24.498	111.4
	16.5778	29.233	101.072
	16.764	34.242	82.389
	16.9503	33.915	62.339
	17.1365	29.16	42.478
	17.3228	21.262	25.223
	17.509	11.987	13.104
	17.6954	5.246	5.245
	17.8816	4.113	1.245
	18.0678	5.475	0.213
	18.2541	4.352	0.047
	18.4404	7.754	0
	18.6267	15.695	0
	18.813	20.65	0
	18.9992	24.125	0
	19.1854	31.109	0
	19.3717	35.683	0
	19.558	33.488	0
	19.7443	28.563	0
	19.9306	22.381	0
	20.1168	16.373	0
	20.303	10.176	0
	20.4894	5.309	0.117
	20.6756	5.258	1.202
	20.8619	13.339	4.033
	21.0481	22.04	10.116
	21.2344	22.553	22.804
	21.4206	16.624	42.866
	21.607	17.815	66.429
	21.7932	29.808	91.82
	21.9794	40.9	119.139
	22.1657	44.877	145.441
	22.352	53.789	165.361
	22.5383	76.846	177.678
	22.7246	99.803	185.868
	22.9108	104.992	193.789
	23.097	92.126	200.748
	23.2833	82.328	202.961
	23.4696	89.443	198.879
	23.6559	111.749	191.157
	23.8422	140.461	183.05
	24.0284	153.34	175.545
	24.2146	152.631	170.714
	24.401	145.618	167.85
	24.5872	130.216	162.966
	24.7735	106.093	158.799
	24.9597	77.915	156.794
	25.146	51.757	152.61
	25.3322	35.64	147.617
	25.5186	37.4	144.274
	25.7048	63.484	141.828
	25.891	108.644	139.503
	26.0773	122.878	136.012
	26.2636	93.187	132.702
	26.4499	63.722	130.105
	26.6362	47.429	126.158
	26.8224	39.839	126.731
	27.0086	42.666	133.705
	27.1949	41.229	137.203
	27.3812	32.939	127.685
	27.5675	29.826	103.831
	27.7538	30.074	69.774
	27.94	29.894	34.264
	28.1262	25.032	10.886
	28.3126	14.237	1.335
	28.4988	7.664	0.072
	28.6851	8.524	0
