# Supplementary material for: Ebola virus sequesters IRF3 in viral inclusion bodies to evade host antiviral immunity
Source: eLife journal article supplement (doi:10.7554/elife.88122), 2023-06-27
Supplement: fig1-data2 [file Figure 1-Source Data 2.xlsx]

## Sheet: Figure 1D
Figure 1D
	The intensities (AU) of VP35 and TBK1 were analyzed by ImageJ software after 48 h of trVLP infection
	Length (μm)	TBK1	VP35
	0	100.487	0
	0.186248	98.166	0
	0.372552	88.721	0
	0.5588	85.806	0
	0.745048	92.81	0
	0.931352	103.577	0
	1.1176	114.015	0
	1.30385	119.43	0.855
	1.49015	114.303	10.985
	1.6764	97.428	47.37
	1.86265	75.745	117.07
	2.04895	56.824	191.882
	2.2352	43.371	234.39
	2.42145	36.677	248.179
	2.60775	35.967	251.19
	2.794	36.205	250.167
	2.98025	33.814	250.489
	3.16655	28.941	250.798
	3.3528	24.915	250.144
	3.53905	25.89	248.619
	3.72535	29.223	247.764
	3.9116	29.179	245.306
	4.09785	26.769	243.534
	4.28415	26.303	246.012
	4.4704	27.103	249.189
	4.65665	26.679	251.368
	4.84295	27.974	252.184
	5.0292	32.65	250.775
	5.21545	41.444	238.25
	5.40175	52.687	188.622
	5.588	62.185	113.899
	5.77425	66.598	45.817
	5.96055	69.818	9.703
	6.1468	74.241	1.485
	6.33305	73.688	9.79
	6.51935	64.127	44.347
	6.7056	51.22	112.782
	6.89185	40.2	187.556
	7.07815	32.093	233.264
	7.2644	26.802	251.078
	7.45065	22.843	254.3
	7.63695	19.157	248.958
	7.8232	15.334	236.373
	8.00945	13.538	220.599
	8.19575	13.007	204.14
	8.382	12.338	191.172
	8.56825	10.799	185.562
	8.75455	8.906	185.609
	8.9408	7.644	189.021
	9.12705	8.326	196.991
	9.31335	10.357	208.873
	9.4996	12.404	224.733
	9.68585	13.017	241.853
	9.87215	12.821	252.123
	10.0584	16.937	247.914
	10.2447	26.146	232.881
	10.4309	38.206	201.283
	10.6172	44.94	157.464
	10.8034	40.789	116.139
	10.9898	31.742	86.923
	11.176	24.917	71.331
	11.3622	24.288	62.516
	11.5486	25.181	53.721
	11.7348	21.849	43.623
	11.921	22.802	33.501
	12.1074	37.631	24.293
	12.2936	57.409	14.616
	12.4799	63.57	5.614
	12.6662	50.866	1.475
	12.8524	42.558	1.943
	13.0387	70.147	2.836
	13.2249	125.149	2.396
	13.4112	176.359	0.831
	13.5975	204.682	0.00059
	13.7837	207.612	0.047
	13.97	196.432	0.505
	14.1562	165.436	2.076
	14.3425	124.597	4.407
	14.5288	100.762	10.08
	14.715	91.69	21.972
	14.9014	84.482	37.288
	15.0876	68.437	49.417
	15.2738	51.275	57.722
	15.4602	42.399	61.014
	15.6464	40.556	59.154
	15.8326	42.051	55.194
	16.019	46.7	50.797
	16.2052	54.837	46.641
	16.3914	64.76	43.469
	16.5778	73.196	44.735
	16.764	71.824	56.109
	16.9503	57.868	79.098
	17.1365	38.636	108.35
	17.3228	23.383	138.86
	17.509	15.531	164.979
	17.6954	12.827	182.38
	17.8816	11.454	188.798
	18.0678	8.842	184.379
	18.2541	5.898	170.492
	18.4404	4.57	150.644
	18.6267	4.794	128.686
	18.813	6.732	109.49
	18.9992	9.623	96.95
	19.1854	11.23	91.701
	19.3717	10.471	92.317
	19.558	9.289	94.1
	19.7443	8.017	93.431
	19.9306	7.697	89.779
	20.1168	8.239	87.276
	20.303	8.569	88.171
	20.4894	8.555	90.617
	20.6756	9.703	92.685
	20.8619	11.99	97.543
	21.0481	13.571	104.051
	21.2344	14.537	111.344
	21.4206	15.032	121.11
	21.607	15.292	133.676
	21.7932	15.648	149.995
	21.9794	17.388	171.181
	22.1657	20.573	191.575
	22.352	26.806	202.947
	22.5383	37.259	204.977
	22.7246	46.234	205.731
	22.9108	47.54	213.539
	23.097	45.981	228.613
	23.2833	49.207	244.168
	23.4696	57.943	252.852
	23.6559	69.585	254.775
	23.8422	81.694	254.958
	24.0284	93.768	253.247
	24.2146	106.308	247.001
	24.401	122.818	233.171
	24.5872	144.969	193.854
	24.7735	163.925	125.008
	24.9597	168.567	56.239
	25.146	157.874	13.887
	25.3322	138.554	0.99
	25.5186	119.969	0.071
	25.7048	120.932	0.329
	25.891	153.819	1.508
	26.0773	201.571	2.609
	26.2636	231.997	2.248
	26.4499	239.247	0.817
	26.6362	235.876	0.144
	26.8224	223.563	1.22
	27.0086	215.8	4.959
