# Supplementary material for: Ebola virus sequesters IRF3 in viral inclusion bodies to evade host antiviral immunity
Source: eLife journal article supplement (doi:10.7554/elife.88122), 2023-06-27
Supplement: fig1-data3 [file Figure 1-Source Data 3.xlsx]

## Sheet: Figure 1F
Figure 1F
	The intensities (AU) of VP35 and IKKε were analyzed by ImageJ software after 48 h of trVLP infection
	Length (μm)	IKKε	VP35
	0	73.369	0
	0.186248	75.987	0
	0.372552	71.809	0
	0.5588	61.466	0
	0.745048	49.49	0
	0.931352	42.559	0.314
	1.1176	52.713	10.479
	1.30385	79.942	47.836
	1.49015	101.213	97.642
	1.6764	101.162	133.108
	1.86265	78.38	143.964
	2.04895	51.804	138.874
	2.2352	42.983	127.691
	2.42145	50.71	118.11
	2.60775	58.491	113.788
	2.794	60.142	111.187
	2.98025	53.962	108.682
	3.16655	40.065	106.398
	3.3528	23.123	102.13
	3.53905	8.961	94.892
	3.72535	6.54	89.508
	3.9116	9.551	84.064
	4.09785	7.331	77.34
	4.28415	2.296	74.507
	4.4704	0.845	76.967
	4.65665	2.937	83.968
	4.84295	4.344	90.522
	5.0292	2.413	95.51
	5.21545	1.634	102.104
	5.40175	6.715	111.91
	5.588	14.723	121.633
	5.77425	24.222	133.601
	5.96055	41.104	151.196
	6.1468	58.415	166.899
	6.33305	69.55	171.476
	6.51935	74.946	157.975
	6.7056	73.071	121.53
	6.89185	69.399	70.934
	7.07815	75.48	25.311
	7.2644	91.432	3.055
	7.45065	101.92	0.042
	7.63695	101.753	0
	7.8232	92.969	0
	8.00945	80.59	1.117
	8.19575	67.795	17.227
	8.382	63.672	54.862
	8.56825	63.121	93.06
	8.75455	56.713	117.57
	8.9408	44.507	127.423
	9.12705	35.747	129.907
	9.31335	34.921	129.424
	9.4996	37.653	124.235
	9.68585	43.71	118.515
	9.87215	49.341	116.285
	10.0584	47.663	117.491
	10.2447	44.885	116.262
	10.4309	46.117	109.978
	10.6172	40.881	105.127
	10.8034	29.741	101.157
	10.9898	19.81	91.334
	11.176	15.848	76.196
	11.3622	24.67	58.243
	11.5486	45.779	43.353
	11.7348	65.349	32.758
	11.921	80.756	21.591
	12.1074	97.338	12.368
	12.2936	113.788	11.471
	12.4799	118.201	16.603
	12.6662	124.85	21.741
	12.8524	148.099	22.955
	13.0387	163.033	25.946
	13.2249	135.121	38.844
	13.4112	78.539	55.081
	13.5975	38.162	63.719
	13.7837	30.034	66.867
	13.97	32.025	71.573
	14.1562	29.325	77.15
	14.3425	24.666	82.601
	14.5288	18.641	87.81
	14.715	12.786	93.453
	14.9014	8.875	97.867
	15.0876	14.898	102.376
	15.2738	26.98	106.722
	15.4602	31.977	109.037
	15.6464	26.272	100.987
	15.8326	19.57	74.631
	16.019	19.085	38.01
	16.2052	22.67	9.96
	16.3914	20.384	0.804
	16.5778	15.094	0
	16.764	12.357	0
	16.9503	19.515	0
	17.1365	33.755	0
	17.3228	46.576	0
	17.509	63.542	0
	17.6954	78.972	0
	17.8816	79.698	0
	18.0678	64.715	0
	18.2541	44.79	0
	18.4404	36.4	0
	18.6267	44.229	0
	18.813	64.302	0
	18.9992	96.58	0
	19.1854	123.037	0.006
	19.3717	113.404	1.047
	19.558	69.034	15.607
	19.7443	28.528	66.204
	19.9306	9.116	131.049
	20.1168	3.29	165.784
	20.303	2.674	164.75
	20.4894	4.389	152.794
	20.6756	6.445	140.541
	20.8619	8.04	125.697
	21.0481	5.697	109.671
	21.2344	2.57	98.577
	21.4206	2.57	94.545
	21.607	3.862	94.842
	21.7932	2.836	94.151
	21.9794	0.882	89.689
	22.1657	0.09	86.43
	22.352	0	87.102
	22.5383	0	90.305
	22.7246	0	96.762
	22.9108	0	104.901
	23.097	0.302	109.07
	23.2833	0.603	111.682
	23.4696	0.542	112.258
	23.6559	0.459	108.484
	23.8422	0.922	106.119
	24.0284	5.416	108.419
	24.2146	16.952	106.52
	24.401	33.316	96.329
	24.5872	50.586	82.229
	24.7735	64.47	62.584
	24.9597	65.356	37.401
	25.146	55.466	14.803
	25.3322	54.3	3.074
	25.5186	62.868	0.072
	25.7048	74.794	0
	25.891	79.756	0
	26.0773	72.325	0
	26.2636	53.908	0
