# Supplementary material for: Ebola virus sequesters IRF3 in viral inclusion bodies to evade host antiviral immunity
Source: eLife journal article supplement (doi:10.7554/elife.88122), 2023-06-27
Supplement: fig2-data1 [file Figure 2-Source Data 1.xlsx]

## Sheet: Figure 2B
Figure 2B
The percentage of IRF3 distribution in IBs at different time points in cells infected with EBOV trVLPs (Figure 2A) was analyzed using the R programming language
Replication (cells)	trVLP(+)/24 h	trVLP(+)/36 h	trVLP(+)/48 h
1	22.19	50.94	77.1
2	29.79	32.05	96.7
3	9.62	62.65	73.04
4	27.16	65.03	68.44
5	7.88	60.29	87.76
6	20.52	37.87	70.33
7	10.17	38.86	74.66
8	8.44	29.16	87.63
