# Supplementary material for: Ebola virus sequesters IRF3 in viral inclusion bodies to evade host antiviral immunity
Source: eLife journal article supplement (doi:10.7554/elife.88122), 2023-06-27
Supplement: fig2-data2 [file Figure 2-Source Data 2.xlsx]

## Sheet: Figure 2C
Figure 2C
The intensities (AU) of VP35 and IRF3 were analyzed by ImageJ software after 24 h of trVLP infection				The intensities (AU) of VP35 and IRF3 were analyzed by ImageJ software after 36 h of trVLP infection				The intensities (AU) of VP35 and IRF3 were analyzed by ImageJ software after 48 h of trVLP infection
Length(μm)	IRF3/24h	VP35/24h		Length(μm)	IRF3/36h	VP35/36h		Length(μm)	IRF3/48h	VP35/48h
0	53.246	58.139		0	0	0		0	0	0
0.186248	41.765	36.783		0.186248	0	0		0.186248	0	0
0.372552	36.075	61.897		0.372552	0	0		0.372552	0	0
0.5588	74.381	26.887		0.5588	0	0		0.5588	0	0
0.745048	102.049	61.682		0.745048	0	0		0.745048	0	0
0.931352	100.583	31.541		0.931352	0	0		0.931352	0	0
1.1176	92.852	46.806		1.1176	0	0		1.1176	0	0
1.30385	77.318	43.284		1.30385	0	0		1.30385	0	0
1.49015	52.504	54.255		1.49015	0	0		1.49015	0	0
1.6764	28.938	39.207		1.6764	0	0		1.6764	0	0
1.86265	34.877	85.223		1.86265	0	0		1.86265	1.669	0
2.04895	48.061	116.892		2.04895	0	0		2.04895	0.5	0
2.2352	68.006	197.768		2.2352	0	0		2.2352	10.055	0.48
2.42145	92.776	235.502		2.42145	0	0		2.42145	8.068	1.176
2.60775	71.735	247.537		2.60775	0	0		2.60775	5.358	0.163
2.794	76.744	248.093		2.794	0	0		2.794	15.573	0
2.98025	88.752	242.314		2.98025	0	0		2.98025	6.382	0
3.16655	85.575	240.617		3.16655	0	0		3.16655	0.882	0
3.3528	67.511	235.34		3.3528	0	0		3.3528	0.737	0
3.53905	58.721	239.963		3.53905	0.005	0		3.53905	0	0.012
3.72535	58.202	245.102		3.72535	0.109	0		3.72535	3.071	6.38
3.9116	74.574	243.837		3.9116	0.008	0		3.9116	14.549	52.094
4.09785	71.763	229.719		4.09785	0	0		4.09785	60.104	184.316
4.28415	57.441	214.426		4.28415	0	0		4.28415	117.491	251.692
4.4704	70.327	197.51		4.4704	0	0		4.4704	178.096	253
4.65665	76.058	202.966		4.65665	0	0		4.65665	198.799	253
4.84295	90.416	192.44		4.84295	0	0		4.84295	196.608	253
5.0292	63.059	188.957		5.0292	0	0		5.0292	224.005	253
5.21545	70.818	160.142		5.21545	0	0		5.21545	224.194	253
5.40175	41.066	152.518		5.40175	0	0		5.40175	192.821	253
5.588	39.676	107.53		5.588	0	0		5.588	182.179	253
5.77425	65.848	105.845		5.77425	0	0		5.77425	161.608	253
5.96055	56.251	58.028		5.96055	1.19	0		5.96055	182.177	253
6.1468	48.872	56.158		6.1468	17.154	0		6.1468	237.954	253
6.33305	50.882	50.513		6.33305	41.635	0		6.33305	214.973	253
6.51935	89.643	101.158		6.51935	49.401	0		6.51935	205.879	253
6.7056	113.115	131.004		6.7056	78.927	0		6.7056	227.661	253
6.89185	81.993	174.466		6.89185	115.794	0.436		6.89185	217.076	253
7.07815	91.025	168.989		7.07815	139.6	29.241		7.07815	226.876	253
7.2644	82.689	163.519		7.2644	222.173	139.053		7.2644	214.476	253
7.45065	53.734	163.765		7.45065	234.676	227.525		7.45065	197.439	253
7.63695	51.177	179.893		7.63695	231.525	246.364		7.63695	196.865	253
7.8232	82.541	163.775		7.8232	227.925	242.574		7.8232	222.458	253
8.00945	82.439	115.995		8.00945	232.143	233.132		8.00945	245.209	253
8.19575	52.246	90.016		8.19575	201.206	193.955		8.19575	223.737	253
8.382	52.726	40.532		8.382	193.357	124.91		8.382	198.521	253
8.56825	25.836	54.618		8.56825	191.158	111.478		8.56825	203.789	253
8.75455	24.27	44.203		8.75455	229.871	130.531		8.75455	236.216	252.648
8.9408	59.055	46.806		8.9408	245.709	176.08		8.9408	196.305	248.76
9.12705	80.399	31.938		9.12705	254.577	215.567		9.12705	164.847	247.801
9.31335	96.017	61.855		9.31335	247.005	221.105		9.31335	205.961	246.421
9.4996	106.372	26.887		9.4996	251.192	206.877		9.4996	200.343	249.898
9.68585	153.98	62.76		9.68585	254.812	199.78		9.68585	206.353	253
9.87215	123.974	37.77		9.87215	254.526	203.717		9.87215	205.321	253
10.0584	80.668	58.867		10.0584	249.092	214.391		10.0584	223.848	253
10.2447	54.231	39.101		10.2447	231.629	211.826		10.2447	208.362	253
10.4309	61.354	62.274		10.4309	183.093	122.985		10.4309	238.478	253
10.6172	69.979	27.794		10.6172	171.972	19.305		10.6172	243.451	253
10.8034	110.84	65.457		10.8034	186.142	12.034		10.8034	224.588	253
10.9898	81.748	32.746		10.9898	172.13	39.226		10.9898	202.508	253
11.176	47.559	49.475		11.176	172.817	74.518		11.176	148.79	253
11.3622	46.905	47.196		11.3622	189.603	89.945		11.3622	126.398	253
11.5486	47.515	60.176		11.5486	218.32	111.061		11.5486	132.513	253
11.7348	36.782	36.979		11.7348	246.012	177.081		11.7348	167.627	253
11.921	41.712	60.498		11.921	254.866	219.965		11.921	155.806	253
12.1074	42.317	27.58		12.1074	253.454	223.23		12.1074	114.24	253
12.2936	46.389	38.778		12.2936	253.127	209.043		12.2936	122.808	253
12.4799	51.962	50.771		12.4799	252.194	195.276		12.4799	174.828	253
12.6662	73.479	50.286		12.6662	249.869	180.225		12.6662	165.919	253
12.8524	91.951	45.132		12.8524	254.375	165.215		12.8524	158.538	253
13.0387	74.492	44.839		13.0387	254.001	159.01		13.0387	208.805	253
13.2249	33.313	94.979		13.2249	254.142	157.018		13.2249	223.236	252.964
13.4112	52.846	95.988		13.4112	246.346	184.658		13.4112	182.991	252.288
13.5975	62.334	117.267		13.5975	240.455	213.971		13.5975	203.818	253
13.7837	69.496	124.052		13.7837	225.368	192.426		13.7837	210.932	253
13.97	47.145	132.42		13.97	180.408	76.611		13.97	220.87	253
14.1562	51.097	149.707		14.1562	133.484	20.223		14.1562	177.934	253
14.3425	97.24	205.516		14.3425	124.484	22.495		14.3425	194.036	241.283
14.5288	84.26	191.242		14.5288	138.274	41.501		14.5288	168.131	237.322
14.715	66.79	176.63		14.715	163.327	58.134		14.715	147.846	245.815
14.9014	60.893	166.194		14.9014	175.343	68.588		14.9014	132.196	253
15.0876	85.653	178.32		15.0876	170.336	65.05		15.0876	130.641	253
15.2738	66.124	171.664		15.2738	139.387	61.032		15.2738	153.011	253
15.4602	63.166	178.631		15.4602	153.921	69.247		15.4602	167.74	253
15.6464	64.501	165.307		15.6464	169.54	68.586		15.6464	167.749	253
15.8326	76.035	166.938		15.8326	192.12	52.823		15.8326	116.566	253
16.019	92.83	138.198		16.019	154.966	24.755		16.019	89.797	246.063
16.2052	142.567	152.02		16.2052	136.572	2.235		16.2052	52.521	211.165
16.3914	106.034	172.011		16.3914	127.343	0.024		16.3914	32.688	78.354
16.5778	84.288	170.067		16.5778	117.963	0		16.5778	37.246	12.408
16.764	75.659	165.236		16.764	82.766	0		16.764	8.188	0.309
16.9503	113.84	156.981		16.9503	80.469	0		16.9503	0	0
17.1365	113.935	131.255		17.1365	112.792	0		17.1365	3.85e-05	0
17.3228	64.824	100.802		17.3228	124.648	0		17.3228	3.527	0
17.509	50.811	71.146		17.509	135.56	0		17.509	20.79	0
17.6954	51.702	52.194		17.6954	174.481	0		17.6954	41.245	0
17.8816	28.517	39.15		17.8816	171.355	0		17.8816	46.785	0
18.0678	25.744	27.943		18.0678	153.346	0		18.0678	34.434	0
18.2541	36.133	57.821		18.2541	125.293	0		18.2541	21.441	0
18.4404	40.045	32.42		18.4404	108.066	0		18.4404	12.822	0
18.6267	29.988	53.418		18.6267	69.25	0		18.6267	7.173	0
18.813	29.627	43.283		18.813	96.437	0		18.813	2.007	0
18.9992	44.396	47.256		18.9992	120.743	0		18.9992	3.186	0
19.1854	45.813	32.982		19.1854	130.791	0		19.1854	23.828	0
19.3717	40.416	69.183		19.3717	90.112	0		19.3717	49.951	0
19.558	48.259	46.303		19.558	80.808	0
19.7443	45.061	82.535		19.7443	120.369	0
19.9306	50.419	63.349		19.9306	164.922	0
20.1168	57.34	81.135
20.303	88.91	65.233
20.4894	80.694	86.347
20.6756	95.355	63.889
20.8619	116.805	94.756
21.0481	80.417	44.022
21.2344	44.991	48.077
21.4206	34.271	43.283
21.607	37.094	53.417
21.7932	61.227	31.936
21.9794	38.839	57.786
22.1657	35.704	27.558
22.352	72.432	38.209
22.5383	99.032	49.225
22.7246	97.743	49.225
22.9108	50.783	38.209
23.097	40.113	27.559
23.2833	53.485	57.787
23.4696	47.892	31.918
23.6559	33.363	53.417
23.8422	89.257	43.284
24.0284	116.613	46.806
24.2146	71.736	31.542
24.401	75.623	61.683
24.5872	103.149	26.887
24.7735	124.808	61.897
24.9597	77.376	36.783
25.146	54.955	58.139
