# Supplementary material for: Ebola virus sequesters IRF3 in viral inclusion bodies to evade host antiviral immunity
Source: eLife journal article supplement (doi:10.7554/elife.88122), 2023-06-27
Supplement: fig2-data4 [file Figure 2-Source Data 4.xlsx]

## Sheet: Figure 2E
Figure 2E
The IRF3 intensity in cells infected with or without EBOV trVLPs for 48 h was analyzed using ImageJ software
Replications (cells)	WT/trVLP(-)	WT/trVLP(+)
1	3.868	2.899
2	2.972	1.994
3	1.949	2.835
4	2.74	2.479
5	2.389	2.259
