# Supplementary material for: Ebola virus sequesters IRF3 in viral inclusion bodies to evade host antiviral immunity
Source: eLife journal article supplement (doi:10.7554/elife.88122), 2023-06-27
Supplement: fig3-data1 [file Figure 3-Source Data 1.xlsx]

## Sheet: Figure 3B
Figure 3B
The signal for the PLA complex in each cell in Figure 3A was counted
Complexes per cell (cell number)	trVLP(-)/poly(I:C)	trVLP(+)/poly(I:C)
1	3	0
2	4	1
3	3	2
4	6	2
5	5	1
6	7	2
7	5	1
8	6	2
9	5	0
10	6	3
11	6	2
12	8	3
