# Supplementary material for: Ebola virus sequesters IRF3 in viral inclusion bodies to evade host antiviral immunity
Source: eLife journal article supplement (doi:10.7554/elife.88122), 2023-06-27
Supplement: fig3-data3 [file Figure 3-Source Data 3.xlsx]

## Sheet: Figure 3D
Figure 3D
	The phosphorylation of IRF3 was inhibited by EBOV trVLP
