# Supplementary material for: Ebola virus sequesters IRF3 in viral inclusion bodies to evade host antiviral immunity
Source: eLife journal article supplement (doi:10.7554/elife.88122), 2023-06-27
Supplement: fig4-data1 [file Figure 4-Source Data 1.xlsx]

## Sheet: Figure 4B
Figure 4B
	The nuclear/cytoplasmic distribution of IRF3 in Figure 4A was analyzed by ImageJ software
		SeV（-）										SeV（+）
	Replication (cells)	1	2	3	4	5	6	7	8	9	10	1	2	3	4	5	6	7	8	9	10
	trVLP(-)	3.94895	7.92772	6.68323	8.34501	2.62131	6.22099	5.82422	2.36012	8.9225	4.56254	90.8649	83.332	73.5897	76.9381	93.0596	96.4754	87.5077	88.0808	93.4145	82.1639
	trVLP(+)	2.08333	4.41501	2.82958	2.70115	19.6342	2.20744	7.84133	8.37838	11.5686	3.69357	6.66632	4.9484	2.07367	1.02229	1.03131	16.3078	6.44524	12.7448	2.92346	1.69297
