# Supplementary material for: Ebola virus sequesters IRF3 in viral inclusion bodies to evade host antiviral immunity
Source: eLife journal article supplement (doi:10.7554/elife.88122), 2023-06-27
Supplement: fig5-data1 [file Figure 5-Source Data 1.xlsx]

## Sheet: Figure 5B
Figure 5B
	The nuclear/cytoplasmic distribution of IRF3 in Figure 5A was analyzed by ImageJ software
Replications (cells)	NC/poly(I:C)	NP-VP35/poly(I:C)	NP-VP35-L/poly(I:C)	NP-VP35-L-VP30/poly(I:C)	NP-VP35-L-VP30-VP24/poly(I:C)	trVLPs
1	4.03122	0.110132	0.114301	0.049207	0.089453	0.213452
2	7.9188	0.160579	0.0190353	0.145553	0.134861	0.13054
3	7.30547	0.0607683	0.190228	0.109886	0.211391	0.0876816
4	6.25678	0.159586	0.0748422	0.0800023	0.10336	0.0535662
5	6.79337	0.0920171	0.0924817	0.168873	0.229168	0.140147
6	3.79978
7	5.08551
8	4.4311
9	5.10212
10	5.67317
