# Supplementary material for: Ebola virus sequesters IRF3 in viral inclusion bodies to evade host antiviral immunity
Source: eLife journal article supplement (doi:10.7554/elife.88122), 2023-06-27
Supplement: fig5-figsupp1-data2 [file Figure 5-figure supplement 1-Source Data 2.xlsx]

## Sheet: Figure 5-s1B
Figure 5-fiure supplement 1B
	The association between NP and IRF3 were detected by immunoprecipitation
