# Supplementary material for: Ebola virus sequesters IRF3 in viral inclusion bodies to evade host antiviral immunity
Source: eLife journal article supplement (doi:10.7554/elife.88122), 2023-06-27
Supplement: fig5-figsupp2-data1 [file Figure 5-figure supplement 2-Source Data 1.xlsx]

## Sheet: Figure 5-s2B
Figure 5-figure supplement 2B
The nuclear/cytoplasmic distribution of IRF3 in Figure 5-supplement 2A was analyzed using ImageJ software
Replications (cells)	NC/SeV	NP-VP35/SeV	NP-VP35-VP24/SeV	NP-VP35-VP30/SeV
1	7.65639	0.207727	0.34665	0.225953
2	9.57219	0.159312	0.300356	0.325496
3	7.456	0.275574	0.338889	0.408333
4	10.1796	0.397857	0.153162	1.02099
5	11.7831	0.193785	0.321088	0.609115
6	10.3978
7	7.40271
8	8.17427
9	9.24883
10	13.9716
