# Supplementary material for: Ebola virus sequesters IRF3 in viral inclusion bodies to evade host antiviral immunity
Source: eLife journal article supplement (doi:10.7554/elife.88122), 2023-06-27
Supplement: fig6-data2 [file Figure 6-Source Data 2.xlsx]

## Sheet:  Figure 6C
Figure 6C
	The intensities (AU) of VP35 and STING were analyzed by ImageJ software after trVLP infection
	Length (μm)	VP35	STING
	0	1	101
	0.183805	0.235	109.284
	0.367666	0	110.332
	0.551471	0	103.571
	0.735276	3.685	88.82
	0.919137	27.907	73.775
	1.10294	80.561	69.291
	1.28675	147.017	79.827
	1.47061	204.439	106.599
	1.65441	237.087	135.422
	1.83822	251.564	150.606
	2.02208	255	158.941
	2.20588	254.865	164.723
	2.38969	253.235	170.574
	2.57355	252.671	177.277
	2.75736	253.941	183.394
	2.94116	254.46	184.716
	3.12502	255	181
	3.30883	254.848	175.73
	3.49263	255	172.429
	3.67649	254.723	172.529
	3.8603	252.671	177.19
	4.0441	248.824	182.495
	4.22796	246.353	186.913
	4.41177	246.54	189.048
	4.59557	248.862	190.353
	4.77943	252.391	192.647
	4.96324	254.626	191.46
	5.14704	255	187.657
	5.3309	255	182.824
	5.51471	255	178.471
	5.69852	254.118	175.076
	5.88238	251.08	170.626
	6.06618	247.201	164.048
	6.24999	243	157
	6.43385	240.118	156.547
	6.61765	235.394	164.99
	6.80146	230.059	181.131
	6.98532	226.637	198.858
	7.16912	225.277	207.806
	7.35293	221.01	204.609
	7.53679	218.08	190.453
	7.72059	217.26	176.754
	7.9044	223.73	171.225
	8.08826	232.01	174.405
	8.27206	237.305	181.471
	8.45587	232.754	186.865
	8.63973	220.187	184.716
	8.82354	204.837	179.924
	9.00734	199.862	167.429
	9.1912	202.422	156.519
	9.37501	210	148
	9.55881	214.609	148.92
	9.74267	211.827	156.647
	9.92648	202.716	167.917
	10.1103	191.695	171.886
	10.2941	184.841	165.343
	10.4779	186.346	150.128
	10.6618	192.879	138.699
	10.8456	198.678	138.021
	11.0294	200.09	152.727
	11.2132	193.772	165.938
	11.3971	184.855	170.993
	11.5809	177.754	166.948
	11.7647	174.028	158.92
	11.9486	168.792	147.581
	12.1324	162.298	139.848
	12.3162	158.917	135.917
	12.5	161	138
	12.6838	165.869	145.128
	12.8676	168.869	149.651
	13.0515	168.052	149.54
	13.2353	163.166	144.567
	13.4191	156.772	136.889
	13.603	152.08	131.256
	13.7868	150.734	131.626
	13.9706	150.408	134.585
	14.1544	152.349	139.173
	14.3382	153.685	140.931
	14.5221	153.737	140.775
	14.7059	151.848	139.723
	14.8897	148.612	141.471
	15.0735	147.235	145.782
	15.2574	148.709	149.512
	15.4412	149.045	147.903
	15.625	146	140
	15.8089	143.069	129.284
	15.9927	141.671	125.235
	16.1765	140.851	125.37
	16.3603	139.837	129.661
	16.5441	141.536	134.637
	16.7279	146.336	140.042
	16.9118	148.889	144.675
	17.0956	146.661	149.138
	17.2794	140.602	157.609
	17.4633	135.381	167.723
	17.6471	131.54	176.363
	17.8309	131.277	184.512
	18.0147	134.107	190
	18.1985	137.035	192.689
	18.3823	140.668	187.391
	18.5662	144.353	179.059
	18.75	150	165
	18.9338	157.799	152.107
	19.1177	166.138	144.765
	19.3015	175.194	143.294
	19.4853	185.73	150.941
	19.6692	196.024	164.817
	19.853	207.92	181.758
	20.0368	223.727	190.471
	20.2206	241.277	178.339
	20.4044	252.218	151.692
	20.5882	254.647	134.353
	20.7721	255	129.785
	20.9559	255	139.619
	21.1397	255	153.734
	21.3236	255	163.003
	21.5074	254.862	163.436
	21.6912	254.695	156.225
	21.875	255	147
	22.0588	251.851	144.875
	22.2426	235.775	144.194
	22.4265	206.931	138.747
	22.6103	167.46	129.695
	22.7941	138.529	122.875
	22.978	117.09	118.415
	23.1618	94.322	116.125
	23.3456	67.273	115.761
	23.5294	33.979	118.997
	23.7133	14.097	114.882
	23.8971	3.993	107.28
	24.0809	0.63	101.644
	24.2647	0.083	105.619
	24.4485	0	114.606
	24.6324	0	121.038
	24.8162	0.083	125.059
	25	1	127
