# Supplementary material for: Ebola virus sequesters IRF3 in viral inclusion bodies to evade host antiviral immunity
Source: eLife journal article supplement (doi:10.7554/elife.88122), 2023-06-27
Supplement: fig6-data3 [file Figure 6-Source Data 3.xlsx]

## Sheet: Figure 6E
Figure 6E
	The intensities (AU) of VP35 and STING were analyzed by ImageJ software in non-infection cells							The intensities (AU) of VP35 and STING were analyzed by ImageJ software after 24 h of trVLP infection						The intensities (AU) of VP35 and STING were analyzed by ImageJ software after 36 h of trVLP infection							The intensities (AU) of VP35 and STING were analyzed by ImageJ software after 48 h of trVLP infection
	Length (μm)	VP35	STING					Length (μm)	VP35	STING				Length (μm)	VP35	STING					Length (μm)	VP35	STING
	0	144.049	0					0	235.353	0				0	36.863	0.199					0	236	0
	0.083622	158.86	0					0.084737	250.933	0				0.084737	33.205	0.219					0.087935	223.773	0
	0.16727	183.892	0					0.1695	243.604	0				0.1695	23.952	0					0.175896	218.178	0
	0.250892	213.223	0					0.254237	210.835	0				0.254237	13.205	0					0.263831	218.712	0
	0.334514	226.139	0					0.338975	165.864	0				0.338975	9.991	0					0.351766	211.975	0
	0.418162	204.41	0					0.423737	129.82	0				0.423737	13.747	0					0.439728	189.38	0
	0.501784	156.023	0					0.508475	113.379	0				0.508475	25.156	0.069					0.527663	146.749	0
	0.585406	107.756	0					0.593212	119.131	0				0.593212	41.655	0.448					0.615598	101.347	0
	0.669054	82.986	0					0.677975	149.675	0				0.677975	54.619	0.401					0.703559	82.094	0
	0.752676	76.254	0					0.762712	194.903	0				0.762712	59.426	0.058					0.791494	79.593	0.248
	0.836298	71.169	0.007884					0.847449	227.646	0				0.847449	59.893	0.118					0.879429	89.535	6.396
	0.919946	64.314	0					0.932212	237.384	0				0.932212	58.522	0					0.967391	106.926	42.491
	1.00357	62.136	0					1.01695	226.898	0.055				1.01695	56.466	0					1.05533	137.597	109.706
	1.08719	61.635	0					1.10169	189.733	0.141				1.10169	59.847	0.614					1.14326	180.026	186.73
	1.17084	60.109	0					1.18645	158.471	0				1.18645	70.157	22.842					1.23122	212.916	240.979
	1.25446	61.968	0					1.27119	151.85	0				1.27119	89.218	102.148					1.31916	229.033	254.213
	1.33808	67.05	0					1.35592	158.519	0				1.35592	106.424	197.786					1.40709	234.902	255
	1.42173	71.233	0					1.44069	163.745	0				1.44069	113.894	247.593					1.49505	239.747	255
	1.50535	75.015	0					1.52542	155.81	0.005				1.52542	122.105	254.995					1.58299	245.502	255
	1.58897	79.178	0					1.61016	137.484	2.406				1.61016	135.545	255					1.67092	252.466	254.934
	1.67262	78.878	0					1.69492	119.886	28.225				1.69492	150.17	254.655					1.75889	255	254.509
	1.75624	70.187	0					1.77966	114.997	95.47				1.77966	159.657	254.351					1.84682	255	254.102
	1.83987	56.984	0					1.8644	136.906	183.652				1.8644	159.882	253.917					1.93476	255	254.611
	1.92351	48.813	0					1.94916	172.495	241.778				1.94916	151.448	253.749					2.02272	255	254.87
	2.00714	44.268	0					2.0339	190.779	254.89				2.0339	142.399	253.982					2.11065	255	254.95
	2.09076	39.756	0					2.11864	185.069	255				2.11864	141.616	254					2.19859	255	255
	2.17441	39.141	0					2.2034	166.788	254.962				2.2034	150.587	254					2.28655	255	254.962
	2.25803	42.971	0					2.28814	153.815	254.015				2.28814	166.262	254					2.37448	254.791	254.538
	2.34165	46.077	0					2.37287	155.236	253.516				2.37287	182.072	254					2.46242	251.448	254.113
	2.4253	47.757	0					2.45764	168.423	253.771				2.45764	195.888	254					2.55038	243.299	254
	2.50892	52.654	0					2.54237	190.063	253.983				2.54237	209.94	254					2.63831	237.913	254
	2.59254	62.291	0					2.62711	210.961	254				2.62711	225.121	254					2.72625	240.518	254
	2.67619	74.037	0					2.71187	218.484	254				2.71187	237.631	254					2.81421	248.063	254
	2.75981	89.472	0					2.79661	208.24	254				2.79661	243.724	254					2.90214	251.691	254
	2.84343	107.282	0					2.88135	188.727	254				2.88135	244.037	254					2.99008	252.405	254
	2.92708	119.354	0					2.96611	175.216	253.996				2.96611	232.314	254					3.07804	253.594	254
	3.0107	118.366	0					3.05085	178.996	253.791				3.05085	214.591	254					3.16598	254.716	254
	3.09433	102.257	0					3.13558	195.937	253.985				3.13558	211.23	254					3.25391	255	254
	3.17797	85.652	0					3.22035	208.197	254.635				3.22035	227.976	254					3.34187	254.508	254
	3.26159	91.659	0					3.30509	203.223	254.643				3.30509	245.286	254					3.42981	254	254
	3.34522	131.507	0					3.38982	187.532	253.441				3.38982	252.405	254					3.51774	254.226	254
	3.42887	177.048	0					3.47458	174.646	249.558				3.47458	248.68	254					3.6057	255	254
	3.51249	177.944	0					3.55932	173.218	244.417				3.55932	240.246	254					3.69364	254.969	254
	3.59611	136.725	0					3.64406	183.857	237.594				3.64406	230.893	254					3.78158	253.547	254
	3.67976	96.357	0					3.72882	202.39	232.326				3.72882	221.33	254					3.86954	252.642	254
	3.76338	89.064	0					3.81356	217.701	227.321				3.81356	216.35	254					3.95747	253.302	254
	3.847	100.117	0					3.8983	218.977	219.216				3.8983	219.325	254					4.04541	253.99	254
	3.93065	104.202	0					3.98306	205.17	203.238				3.98306	224.96	254					4.13337	254.953	254
	4.01427	98.304	0					4.0678	186.179	176.171				4.0678	220.556	254					4.2213	254.528	254
	4.09789	89.461	0					4.15253	175.508	135.696				4.15253	202.068	254					4.30924	254	254
	4.18154	78.613	0					4.2373	180.42	85.555				4.2373	180.927	254					4.3972	254	254
	4.26516	67.084	0					4.32203	185.401	37.705				4.32203	179.493	254					4.48513	254	254
	4.34879	63.448	0					4.40677	172.882	7.967				4.40677	198.684	254					4.57307	254	254
	4.43243	68.756	0					4.49153	146.377	0.321				4.49153	220.568	254					4.66103	254	254
	4.51605	79.337	0					4.57627	127.872	0				4.57627	228.138	254					4.74897	254	254
	4.59968	92.614	0					4.66101	131.27	0				4.66101	220.646	254					4.8369	254.349	254
	4.68332	108.753	0					4.74577	151.91	0				4.74577	208.043	254					4.92486	254.774	254
	4.76695	114.738	0					4.83051	177.278	0				4.83051	203.061	253.875					5.0128	254.254	254
	4.85057	109.786	0					4.91525	191.366	0				4.91525	207.272	253.606					5.10073	252.849	254
	4.93422	106.057	0					5.00001	188.918	0				5.00001	214.57	254.213					5.18869	251.953	254
	5.01784	111.268	0					5.08475	181.056	0				5.08475	216.679	254.52					5.27663	252.028	254
	5.10146	114.014	0					5.16948	180.727	0				5.16948	210.766	254.976					5.36456	253.245	254
	5.18511	102.629	0					5.25425	191.669	0				5.25425	193.811	254.966					5.45252	254.103	254
	5.26873	80.125	0					5.33898	212.304	0				5.33898	166.869	247.273					5.54046	254.297	254
	5.35235	54.793	0					5.42372	229.822	0				5.42372	142.631	223.122					5.62839	254.962	254
	5.436	42.534	0					5.50848	233.403	0				5.50848	132.068	193.942					5.71636	255	254
	5.51962	60.045	0					5.59322	223.128	0				5.59322	136.329	180.267					5.80429	254.241	254
	5.60325	97.808	0					5.67796	197.113	0				5.67796	140.374	192.462					5.89223	252.252	254
	5.68689	118.958	0					5.76272	169.606	0				5.76272	142.42	218.086					5.98019	252.368	254
	5.77051	108.408	0					5.84746	153.546	0				5.84746	149.239	239.378					6.06812	254.279	254
	5.85414	83.785	0					5.9322	145.655	0				5.9322	163.268	249.637					6.15606	255	254
	5.93778	75.041	0					6.01696	133.621	0				6.01696	180.407	253.83					6.24402	255	254
	6.02141	76.75	0					6.1017	109.818	0				6.1017	200.319	254.688					6.33195	255	254
	6.10503	77.576	0					6.18643	80	0				6.18643	219.904	254.483					6.41989	255	254.001
	6.18868	79.244	0					6.27119	57.679	1.34				6.27119	233.186	254.307					6.50785	255	254.011
	6.2723	85.345	0					6.35593	53.762	10.385				6.35593	236.939	253.869					6.59579	255	254.148
	6.35592	87.691	0					6.44067	66.09	31.753				6.44067	239.655	253.593					6.68372	255	254.83
	6.43957	80.491	0					6.52543	74.496	71.67				6.52543	243.661	253.712					6.77168	255	255
	6.52319	69.721	0.046644					6.61017	80.68	132.723				6.61017	245.866	253.692					6.85962	254.637	255
	6.60681	60.11	0.162989					6.69491	106.435	201.553				6.69491	242.169	253.841					6.94755	251.723	255
	6.69046	54.694	0.094985					6.77967	131.105	245.106				6.77967	228.819	254					7.03551	249.571	255
	6.77408	55.056	0					6.86441	136.517	254.129				6.86441	215.585	253.988					7.12345	243.99	255
	6.85771	63.066	0					6.94914	145.341	255				6.94914	217.366	253.995					7.21138	249.627	254.571
	6.94135	72.547	0					7.03391	171.302	254.913				7.03391	229.1	254					7.29934	254.804	244.432
	7.02498	73.257	0					7.11864	210.235	254.184				7.11864	235.99	253.999					7.38728	254.949	220.59
	7.1086	63.158	0					7.20338	242.978	253.884				7.20338	235.175	254					7.47521	255	195.16
	7.19224	57.983	0					7.28814	254.109	254.002				7.28814	230.583	254					7.56318	248.826	173.536
	7.27587	67.661	0					7.37288	255	253.855				7.37288	225.207	254					7.65111	226.493	159.818
	7.35949	84.858	0					7.45762	254.025	253.376				7.45762	218.617	254					7.73905	209.414	150.185
	7.44314	103.245	0					7.54238	248.656	253.787				7.54238	209.477	254					7.82701	214.649	143.241
	7.52676	118.491	0					7.62712	237.285	254.511				7.62712	202.287	254					7.91494	234.057	141.272
	7.61038	141.655	0					7.71186	220.391	254.959				7.71186	200.847	254					8.00288	248.468	146.123
	7.69403	167.314	0					7.79662	201.491	255				7.79662	205.249	254					8.09084	255	155.834
	7.77765	176.632	0					7.88136	182.887	254.751				7.88136	216.931	254					8.17877	255	163.009
	7.86127	173.134	0					7.96609	162.97	252.015				7.96609	232.898	254					8.26671	254.15	167.66
	7.94492	171.61	0					8.05086	140.172	238.489				8.05086	246.656	254					8.35467	233.497	167.324
	8.02854	173.202	0					8.13559	116.085	198.617				8.13559	249.451	254					8.44261	183.831	161.995
	8.11216	171.71	0					8.22033	82.632	138.433				8.22033	238.812	254					8.53054	141.511	154.496
	8.19581	154.908	0					8.30509	46.569	79.801				8.30509	215.438	254					8.6185	117.09	147.241
	8.27943	128.447	0					8.38983	36.251	37.621				8.38983	187.171	254					8.70644	107.114	142.33
	8.36306	106.509	0					8.47457	54.092	13.181				8.47457	172.825	254					8.79437	106.322	133.948
	8.4467	88.598	0					8.55933	77.198	2.612				8.55933	172.178	254					8.88233	104.714	121.004
	8.53033	72.737	0					8.64407	89.163	0.103				8.64407	179.866	254					8.97027	101.747	101.263
	8.61395	61.007	0					8.7288	85.451	0.07				8.7288	191.43	253.968					9.0582	88.899	77.926
	8.6976	58.718	0					8.81357	79.161	0.417				8.81357	199.768	253.691					9.14616	68.793	53.538
	8.78122	62.447	0					8.89831	83.341	0.286				8.89831	202.021	253.801					9.2341	55.208	29.804
	8.86484	65.807	0					8.98304	93.324	0.006				8.98304	197.447	253.77					9.32203	52	10
	8.94849	67.485	0					9.0678	92.654	0				9.0678	188.164	253.374
	9.03211	72.617	0					9.15254	78.05	0				9.15254	178.105	254.304
	9.11573	82.404	0					9.23728	61.786	0				9.23728	167.102	254.968
	9.19938	93.077	0					9.32204	57.215	0				9.32204	157.953	254.878
	9.283	98.885	0					9.40678	62.342	0				9.40678	150.561	254.735
	9.36662	103.073	0					9.49152	66.505	0				9.49152	143.878	252.243
	9.45027	110.442	0					9.57628	69.47	0				9.57628	137.437	244.168
	9.53389	119.479	0					9.66102	76.438	0				9.66102	128.249	218.671
								9.74575	85.527	0				9.74575	108.523	137.22
								9.83052	88.064	0				9.83052	80.51	40.122
								9.91525	79.704	0				9.91525	54.193	1.476
								9.99999	68.222	0				9.99999	32.653	0.058
								10.0847	63.554	0				10.0847	18.512	0.651
								10.1695	68.183	0				10.1695	14.542	1.621
														10.2542	23.496	0.986
														10.339	41.245	0.086
														10.4237	57.564	0
														10.5085	66.591	0
														10.5932	64.14	0
														10.678	57.721	0
														10.7627	55.114	0
														10.8475	57.299	0
														10.9322	63.438	0
														11.0169	70.392	0
