# Supplementary material for: Ebola virus sequesters IRF3 in viral inclusion bodies to evade host antiviral immunity
Source: eLife journal article supplement (doi:10.7554/elife.88122), 2023-06-27
Supplement: fig6-data4 [file Figure 6-Source Data 4.xlsx]

## Sheet: Figure 6G
Figure 6G
	The silencing efficiency of STING siRNA was determined by immunoblotting
