# Supplementary material for: Ebola virus sequesters IRF3 in viral inclusion bodies to evade host antiviral immunity
Source: eLife journal article supplement (doi:10.7554/elife.88122), 2023-06-27
Supplement: fig6-figsupp1-data1 [file Figure 6-figure supplement 1-Source Data 1.xlsx]

## Sheet: Figure 6-figure supplement 1
Figure 6-figure supplement 1
	The percentage of STING distribution in IBs at different time points in EBOV trVLPs-infected cells in Figure 6D was analyzed with R programming language
	Replication (cells)	trVLP(+)/24 h	trVLP(+)/36 h
	1	11.3864	50.9355
	2	10.4745	32.0513
	3	3.18761	62.6506
	4	3.54938	65.0307
	5	2.47262	60.2902
	6	6.50208	37.8689
