# Supplementary material for: Ebola virus sequesters IRF3 in viral inclusion bodies to evade host antiviral immunity
Source: eLife journal article supplement (doi:10.7554/elife.88122), 2023-06-27
Supplement: fig7-data1 [file Figure 7-Source Data 1.xlsx]

## Sheet: Figure 7A
Figure 7A
	The effect of VP35 on IFN-β transcription was detected by qRT-PCR
Replicaiton	SeV(-)	SeV(+)	SeV(+)/VP35(0.0625μg )	SeV(+)/VP35(0.125μg )	SeV(+)/VP35(0.25μg )	SeV(+)/VP35(0.50μg )
1	0.944531	447.697	357.613	317.087	164.459	106.715
2	0.925717	514.466	387.426	389.613	156.294	118.163
3	1.14368	589.883	360.041	345.993	181.318	118.106
