# Supplementary material for: Ebola virus sequesters IRF3 in viral inclusion bodies to evade host antiviral immunity
Source: eLife journal article supplement (doi:10.7554/elife.88122), 2023-06-27
Supplement: fig7-data2 [file Figure 7-Source Data 2.xlsx]

## Sheet: Figure 7B
Figure 7B
	Luciferase activities were used to detect the effect of viral protein on IFNβ production
Replicaiton	NC	VP35-NP-VP30-L	NC/SeV	VP35/SeV	NP/SeV	VP35-NP/SeV	VP35-NP-VP30-L/SeV
1	1.07903	1.55628	375.811	297.73	304.652	100.919	15.1907
2	0.967449	1.61457	325.717	268.966	322.307	98.523	13.4626
3	0.95353	2.23396	340.691	252.126	309.465	121.335	14.3951
