# Supplementary material for: Ebola virus sequesters IRF3 in viral inclusion bodies to evade host antiviral immunity
Source: eLife journal article supplement (doi:10.7554/elife.88122), 2023-06-27
Supplement: fig7-data3 [file Figure 7-Source Data 3.xlsx]

## Sheet: Figure 7C
Figure 7C
	The effect of NP/VP35/VP30/L on IFNβ transcription is regulated by IRF3
		Control			Poly(I:C)
	Replication	1	2	3	1	2	3
	WT	1.0706	0.93628	0.99728	2.45717	3.86385	2.86645
	WT-NP/VP35/VP30/L	1.67825	1.6259	1.9047	2.61937	2.05188	1.09032
	IRF3-/-	0.650305	0.667134	1.15746	0.905389	0.957555	0.872161
	IRF3-/--NP/VP35/VP30/L	1.1248	1.47219	1.14739	1.21659	1.62205	1.52507
