# Supplementary material for: Ebola virus sequesters IRF3 in viral inclusion bodies to evade host antiviral immunity
Source: eLife journal article supplement (doi:10.7554/elife.88122), 2023-06-27
Supplement: fig7-data4 [file Figure 7-Source Data 4.xlsx]

## Sheet: Figure 7D
Figure 7D
	The effect of NP/VP35/VP30/L on CXCL10 transcription is regulated by IRF3
		Control			SeV			SeV/VP35			SeV/NP-VP35-VP30-L
	replication	1	2	3	1	2	3	1	2	3	1	2	3
	WT	0.859759	1.41447	0.822298	22685.4	29343.1	22690.8	14099.9	15816	15418.4	6352.5	5891.07	7394.36
	IRF3-/-	0.910151	0.729274	1.50659	5.78387	4.94519	6.30558	6.49555	6.40632	7.59401	24.0575	23.0725	24.5251
