# Supplementary material for: Ebola virus sequesters IRF3 in viral inclusion bodies to evade host antiviral immunity
Source: eLife journal article supplement (doi:10.7554/elife.88122), 2023-06-27
Supplement: fig7-data5 [file Figure 7-Source Data 5.xlsx]

## Sheet: Figure 7E
Figure 7E
	The effect of NP/VP35/VP30/L on ISG15 transcription is regulated by IRF3
		Control			SeV			SeV/VP35			SeV/NP-VP35-VP30-L
	replication	1	2	3	1	2	3	1	2	3	1	2	3
	WT	0.853337	0.963791	1.2159	575.886	649.731	436.377	293.71	311.027	321.371	181.231	183.319	221.566
	IRF3-/-	0.883284	1.01694	1.11328	0.355297	0.34415	0.355389	0.473358	0.436595	0.525099	0.496031	0.522965	0.529657
