# Supplementary material for: Ebola virus sequesters IRF3 in viral inclusion bodies to evade host antiviral immunity
Source: eLife journal article supplement (doi:10.7554/elife.88122), 2023-06-27
Supplement: fig7-data6 [file Figure 7-Source Data 6.xlsx]

## Sheet: Figure 7F
Figure 7F
	The effect of NP/VP35/VP30/L on ISG56 transcription is regulated by IRF3
		Control			SeV			SeV/VP35			SeV/NP-VP35-VP30-L
	replication	1	2	3	1	2	3	1	2	3	1	2	3
	WT	1.12876	1.27513	0.694778	2029.84	2125.16	1612.36	1385.44	1272.65	1287.72	1110.36	1111.35	1101.35
	IRF3-/-	1.38751	1.17377	0.614016	0.435817	0.435554	0.302604	0.478305	0.40451	0.41678	0.687934	0.417496	0.532185
