# Supplementary material for: Ebola virus sequesters IRF3 in viral inclusion bodies to evade host antiviral immunity
Source: eLife journal article supplement (doi:10.7554/elife.88122), 2023-06-27
Supplement: fig7-data7 [file Figure 7-Source Data 7.xlsx]

## Sheet: Figure 7G
Figure 7G
	Activated IRF3 (IRF3/5D), rather than IRF3, inhibit EBOV trVLP replication
Replications(luciferase)	IRF3+/+/trVLP	IRF3-/-/trVLP	IRF3-/-/IRF3/trVLP	IRF3-/-/IRF3-5D/trVLP
1	97.0665	121.063	86.1182	50.3348
2	104.564	131.18	84.2348	50.4578
3	98.3702	82.2004	76.1176	49.0443
