# Supplementary material for: Ebola virus sequesters IRF3 in viral inclusion bodies to evade host antiviral immunity
Source: eLife journal article supplement (doi:10.7554/elife.88122), 2023-06-27
Supplement: fig7-data8 [file Figure 7-Source Data 8.xlsx]

## Sheet: Figure 7H
Figure 7H
	IRF3 knockout does not affect EBOV replication
		WT/EBOV			IRF3-/-/EBOV
	Replications	1	2	3	1	2	3
	0 days (Log10 TCID50/ml)	2.72	2.86	2.76	2.6	2.65	2.77
	2 days (Log10 TCID50/ml)	5.01	4.98	4.98	4.78	4.73	4.73
	4 days (Log10 TCID50/ml)	6.03	6.06	6.08	5.83	5.68	5.96
	6 days (Log10 TCID50/ml)	6.15	6.12	6.21	6.15	6.2	6.15
