# Supplementary material for: Ebola virus sequesters IRF3 in viral inclusion bodies to evade host antiviral immunity
Source: eLife journal article supplement (doi:10.7554/elife.88122), 2023-06-27
Supplement: fig7-figsupp1-data1 [file Figure 7-figure supplement 1-Source Data 1.xlsx]

## Sheet: Figure 7-s1A
Figure 7-figure supplement 1A
	The expression of WT and IRF3-/- HeLa cells were detected by immunoblotting
